# Supplementary material for: Significance of Concurrent Chemoradiotherapy as Primary Treatment in Patients with Metastatic Cervical Cancer
Source: MDPI journal article supplement (doi:10.3390/curroncol28030155), 2021-04-29
Supplement: s1 [file s1]

## Supplementary Materials

**Table S1.** Patients' characteristics regarding metastasis in stage IVB group.

| Site of Distant Metastasis | n  | %      |
|----------------------------|----|--------|
| DLN only                   | 6  | 13.3   |
| PaLN + DLN                 | 4  | 8.9    |
| Distant organ only         | 22 | 48.9   |
| Lung                       | 12 | (54.5) |
| Bone                       | 2  | (9.1)  |
| Liver                      | 1  | (4.5)  |
| Peritoneum                 | 3  | (13.6) |
| Lung + Bone                | 1  | (4.5)  |
| Liver + Bone               | 2  | (9.1)  |
| Liver + Peritoneum         | 1  | (4.5)  |
| Distant organ + PaLN       | 13 | 28.9   |
| Lung + PaLN                | 4  | (30.8) |
| Liver + PaLN               | 1  | (7.7)  |
| Peritoneum + PaLN          | 2  | (15.4) |
| Rectum + PaLN              | 1  | (7.7)  |
| Lung + Liver + PaLN        | 3  | (23.1) |
| Lung + Bone + PaLN         | 1  | (7.7)  |
| Bone + Peritoneum + PaLN   | 1  | (7.7)  |

PaLN, paraaortic lymph node; DLN, distant lymph node.
